# Supplementary material for: Human Sclera Maintains Common Characteristics with Cartilage throughout Evolution
Source: PubMed Central journal article supplement (PMC2579486; doi:10.1371/journal.pone.0003709), 2008-11-12
Supplement: pone.0003709.s002.pdf [file pone.0003709.s002.pdf]

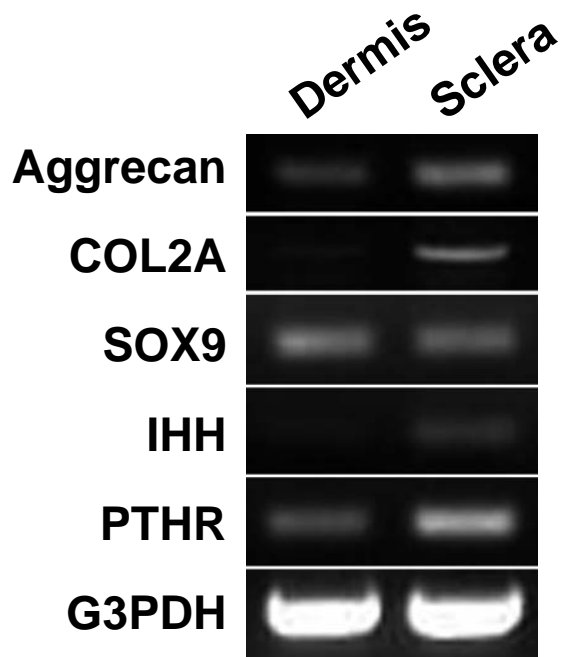

Figure S2
