# Supplementary material for: Human Sclera Maintains Common Characteristics with Cartilage throughout Evolution
Source: PubMed Central journal article supplement (PMC2579486; doi:10.1371/journal.pone.0003709), 2008-11-12
Supplement: pone.0003709.s003.pdf [file pone.0003709.s003.pdf]

Table S1. Cartilage-associated genes

| <b>Systematic</b> | <b>Common</b> | <b>Description</b>                                                                        | <b>Genbank</b> |
|-------------------|---------------|-------------------------------------------------------------------------------------------|----------------|
| 1554950_at        | AGC1          | aggrecan 1                                                                                | BC036445       |
| 205679_x_at       | AGC1          | aggrecan 1                                                                                | NM_013227      |
| 207692_s_at       | AGC1          | aggrecan 1                                                                                | NM_001135      |
| 217161_x_at       | AGC1          | aggrecan 1                                                                                | X17406         |
| 202701_at         | BMP1          | bone morphogenetic protein 1                                                              | NM_006129      |
| 205574_x_at       | BMP1          | bone morphogenetic protein 1                                                              | NM_001199      |
| 206725_x_at       | BMP1          | bone morphogenetic protein 1                                                              | NM_006128      |
| 207595_s_at       | BMP1          | bone morphogenetic protein 1                                                              | NM_006132      |
| 205289_at         | BMP2          | bone morphogenetic protein 2                                                              | AA583044       |
| 205290_s_at       | BMP2          | bone morphogenetic protein 2                                                              | NM_001200      |
| 214716_at         | BMP2K         | BMP2 inducible kinase                                                                     | AW504018       |
| 219546_at         | BMP2K         | BMP2 inducible kinase                                                                     | NM_017593      |
| 226853_at         | BMP2K         | AU145366 HEMBA1 Homo sapiens cDNA clone HEMBA1004631 3', mRNA sequence.                   | AU145366       |
| 232688_at         | BMP2K         | AU144829 HEMBA1 Homo sapiens cDNA clone HEMBA1003086 3', mRNA sequence.                   | AU144829       |
| 37170_at          | BMP2K         | BMP2 inducible kinase                                                                     | AB015331       |
| 59644_at          | BMP2K         | at10e09.x1 Barstead aorta HPLRB6 Homo sapiens cDNA clone IMAGE:2354728 3', mRNA sequence. | AI735391       |
| 206837_at         | CART1         | cartilage paired-class homeoprotein 1                                                     | NM_006982      |
| 219049_at         | ChGn          | chondroitin beta1,4 N-acetylgalactosaminyltransferase                                     | NM_018371      |
| 223987_at         | CHRD12        | chordin-like 2                                                                            | AF332891       |
| 221065_s_at       | CHST8         | carbohydrate (N-acetylgalactosamine 4-0) sulfotransferase 8                               | NM_022467      |
| 223737_x_at       | CHST9         | carbohydrate (N-acetylgalactosamine 4-0) sulfotransferase 9                               | AF239821       |
| 224400_s_at       | CHST9         | carbohydrate (N-acetylgalactosamine 4-0) sulfotransferase 9                               | AF332473       |
| 205941_s_at       | COL10A1       | tc30d11.x1 Soares_total_fetus_Nb2HF8_9w Homo sapiens cDNA clone IMAGE:2066133 3'          | AI376003       |

|              |            |                                                                             |           |
|--------------|------------|-----------------------------------------------------------------------------|-----------|
| 217428_s_at  | COL10A1    | H.sapiens type X collagen gene.                                             | X98568    |
| 204320_at    | COL11A1    | collagen, type XI, alpha 1                                                  | NM_001854 |
| 229271_x_at  | COL11A1    | collagen, type XI, alpha 1                                                  | BG028597  |
| 37892_at     | COL11A1    | collagen, type XI, alpha 1                                                  | J04177    |
| 213870_at    | COL11A2    |                                                                             | AL031228  |
| 216993_s_at  | COL11A2    |                                                                             | U32169    |
| 213492_at    | COL2A1     | collagen, type II, alpha 1                                                  | X06268    |
| 217404_s_at  | COL2A1     | collagen, type II, alpha 1                                                  | X16468    |
| 1555527_at   | COL9A1     | collagen, type IX, alpha 1                                                  | BC015409  |
| 222008_at    | COL9A1     | collagen, type IX, alpha 1                                                  | NM_001851 |
| 243932_at    | COL9A1     | collagen, type IX, alpha 1                                                  | AI286254  |
| 213622_at    | COL9A2     | collagen, type IX, alpha 2                                                  | AI733465  |
| 231264_at    | COL9A2     |                                                                             | AL050341  |
| 232542_at    | COL9A2     | collagen, type IX, alpha 2                                                  | AU145185  |
| 204724_s_at  | COL9A3     | collagen, type IX, alpha 3                                                  | NM_001853 |
| 237427_at    | COL9A3     | collagen, type IX, alpha 3                                                  | AI678209  |
| 205713_s_at  | COMP       | cartilage oligomeric matrix protein                                         | NM_000095 |
| 209365_s_at  | ECM1       | extracellular matrix protein 1                                              | U65932    |
| 1568779_a_at | ECM2       | extracellular matrix protein 2, female organ and adipocyte specific         | AI473096  |
| 206101_at    | ECM2       | extracellular matrix protein 2, female organ and adipocyte specific         | NM_001393 |
| 1553257_at   | GAL3ST3    | beta-galactose-3-O-sulfotransferase 3                                       | AY026481  |
| 219815_at    | GAL3ST4    | beta-galactose-3-O-sulfotransferase, 4                                      | NM_024637 |
| 218871_x_at  | GALNAC T-2 | chondroitin sulfate GalNAcT-2                                               | NM_018590 |
| 206614_at    | GDF5       | growth differentiation factor 5 (cartilage-derived morphogenetic protein-1) | NM_000557 |
| 221062_at    | HS3ST3B1   | heparan sulfate (glucosamine) 3-O-sulfotransferase 3B1                      | NM_006041 |

|             |              |                                                                                                                        |           |
|-------------|--------------|------------------------------------------------------------------------------------------------------------------------|-----------|
| 206997_s_at | HS6ST1       | heparan sulfate 6-O-sulfotransferase 1                                                                                 | NM_004807 |
| 225263_at   | HS6ST1       | heparan sulfate 6-O-sulfotransferase 1                                                                                 | BC001196  |
| 202689_at   | HUMAGC<br>GB | chromosome 3p21.1 gene sequence                                                                                        | NM_013286 |
| 226987_at   | HUMAGC<br>GB | chromosome 3p21.1 gene sequence                                                                                        | W68720    |
| 215420_at   | IHH          | Indian hedgehog homolog (Drosophila)                                                                                   | BE869172  |
| 229358_at   | IHH          | Indian hedgehog homolog (Drosophila)                                                                                   | AA628967  |
| 201744_s_at | LUM          | lumican                                                                                                                | NM_002345 |
| 229554_at   | LUM          | lumican                                                                                                                | AI141861  |
| 206904_at   | MATN1        | matrilin 1, cartilage matrix protein                                                                                   | M55683    |
| 206905_s_at | MATN1        | matrilin 1, cartilage matrix protein                                                                                   | NM_002379 |
| 202291_s_at | MGP          | matrix Gla protein                                                                                                     | NM_000900 |
| 205959_at   | MMP13        | matrix metalloproteinase 13 (collagenase 3)                                                                            | NM_002427 |
| 1554010_at  | NDST1        | N-deacetylase/N-sulfotransferase (heparan glucosaminyl) 1                                                              | BC012888  |
| 202608_s_at | NDST1        | N-deacetylase/N-sulfotransferase (heparan glucosaminyl) 1                                                              | NM_001543 |
| 204223_at   | PRELP        | proline arginine-rich end leucine-rich repeat protein                                                                  | NM_002725 |
| 228224_at   | PRELP        | proline arginine-rich end leucine-rich repeat protein                                                                  | AA573140  |
| 37022_at    | PRELP        | proline-arginine-rich end leucine-rich repeat protein PRELP;<br>Human prolargin (PRELP) gene, exon 3 and complete cds. | U41344    |
| 218088_s_at | RRAGC        | Ras-related GTP binding C                                                                                              | NM_022157 |
| 222514_at   | RRAGC        | Ras-related GTP binding C                                                                                              | AK023373  |
| 242531_at   | RRAGC        | Ras-related GTP binding C                                                                                              | H56010    |
| 219480_at   | SNAI1        | snail homolog 1 (Drosophila)                                                                                           | NM_005985 |
| 1569638_at  | SOX5         | SRY (sex determining region Y)-box 5                                                                                   | BC014929  |
| 207336_at   | SOX5         | SRY (sex determining region Y)-box 5                                                                                   | NM_006940 |
| 216561_x_at | SOX5         | Homo sapiens SOX-29 protein (SOX29) gene, partial cds.                                                                 | AF032454  |
| 238285_at   | SOX5         | SRY (sex determining region Y)-box 5                                                                                   | BE467463  |

|             |       |                                                                                     |           |
|-------------|-------|-------------------------------------------------------------------------------------|-----------|
| 1563454_at  | SOX6  | SRY (sex determining region Y)-box 6                                                | AL833302  |
| 1570486_at  | SOX6  | SRY (sex determining region Y)-box 6                                                | BC029429  |
| 223865_at   | SOX6  | SRY (sex determining region Y)-box 6                                                | AF309034  |
| 224178_s_at | SOX6  | SRY (sex determining region Y)-box 6                                                | AL136780  |
| 202935_s_at | SOX9  | SRY (sex determining region Y)-box 9 (campomelic dysplasia, autosomal sex-reversal) | AI382146  |
| 202936_s_at | SOX9  | SRY (sex determining region Y)-box 9 (campomelic dysplasia, autosomal sex-reversal) | NM_000346 |
| 1555540_at  | TGFB3 | transforming growth factor, beta 3                                                  | BC018503  |
| 209747_at   | TGFB3 | transforming growth factor, beta 3                                                  | J03241    |
| 213303_x_at | ZBTB7 | zinc finger and BTB domain containing 7                                             | AF097916  |

---
